# Supplementary material for: Stable isotopes track the ecological and biogeochemical legacy of mass mangrove forest dieback in the Gulf of Carpentaria, Australia
Source: Copernicus journal article supplement (doi:10.5194/bg-2019-468), 2020-03-02
Supplement: Supplementary file 1 [file bg-2019-468-supplement.pdf]

## Supplementary material

**Table S1.** Stable C, N and S isotopic compositions of animals

| Forest     | Year | Group         | Taxa                             | $\delta^{13}\text{C}$ | SE  | $\delta^{15}\text{N}$ | SE  | $\delta^{34}\text{S}$ | SE  | n |
|------------|------|---------------|----------------------------------|-----------------------|-----|-----------------------|-----|-----------------------|-----|---|
| Unimpacted | 2016 | algae feeder  | <i>Tubuca signata</i>            | -17.4                 | 0.3 | 6.7                   | 0.3 | 14.3                  | 1.0 | 3 |
| Unimpacted | 2017 | algae feeder  | <i>Tubuca signata</i>            | -17.1                 | 0.8 | 6.0                   | 0.2 | 14.2                  | 0.2 | 3 |
| Unimpacted | 2018 | algae feeder  | <i>Tubuca signata</i>            | -16.5                 | 0.4 | 6.9                   | 0.2 | 14.7                  | 0.2 | 5 |
| Unimpacted | 2017 | filter feeder | <i>Saccostrea sp.</i>            | -19.3                 | 0.2 | 7.8                   | 0.1 | 13.5                  | 0.4 | 3 |
| Unimpacted | 2018 | filter feeder | <i>Saccostrea sp.</i>            | -20.2                 | 0.1 | 6.9                   | 0.2 | 14.0                  | 0.3 | 3 |
| Unimpacted | 2016 | grazer        | <i>Telescopium telescopium</i>   | -20.3                 | 0.1 | 7.1                   | 0.0 | 10.9                  | 1.0 | 2 |
| Unimpacted | 2017 | grazer        | <i>Telescopium telescopium</i>   | -18.2                 | 1.1 | 6.4                   | 0.1 | 12.0                  | 1.1 | 3 |
| Unimpacted | 2018 | grazer        | <i>Telescopium telescopium</i>   | -18.4                 | 0.8 | 7.3                   | 0.2 | 11.3                  | 0.9 | 6 |
| Unimpacted | 2016 | leaf feeder   | <i>Parasesarma or Episesarma</i> | -21.0                 | 0.3 | 7.7                   | 0.3 | 11.5                  | 1.0 | 3 |
| Unimpacted | 2017 | leaf feeder   | <i>Parasesarma or Episesarma</i> | -21.1                 | 0.8 | 8.1                   | 0.4 | 12.9                  | 2.0 | 4 |
| Unimpacted | 2018 | leaf feeder   | <i>Parasesarma or Episesarma</i> | -22.0                 | 0.5 | 7.9                   | 0.4 | 15.0                  | 0.7 | 4 |
| Impacted   | 2016 | algae feeder  | <i>Tubuca signata</i>            | -15.7                 | 0.7 | 7.5                   | 0.2 | 17.0                  | 0.2 | 3 |
| Impacted   | 2017 | algae feeder  | <i>Tubuca signata</i>            | -15.4                 | 0.8 | 8.4                   | 0.4 | 15.5                  | 0.3 | 3 |
| Impacted   | 2018 | algae feeder  | <i>Tubuca signata</i>            | -15.1                 | 0.2 | 7.3                   | 0.4 | 16.7                  | 0.2 | 6 |
| Impacted   | 2017 | filter feeder | <i>Saccostrea sp.</i>            | -19.0                 | 0.5 | 7.9                   | 0.1 | 14.5                  | 0.4 | 3 |
| Impacted   | 2018 | filter feeder | <i>Saccostrea sp.</i>            | -20.0                 | 0.0 | 7.5                   | 0.1 | 15.2                  | 0.2 | 3 |
| Impacted   | 2016 | grazer        | <i>Telescopium telescopium</i>   | -16.2                 | 0.1 | 7.5                   | 0.0 | 14.1                  | 0.7 | 2 |
| Impacted   | 2017 | grazer        | <i>Telescopium telescopium</i>   | -16.7                 | 0.8 | 7.2                   | 0.1 | 14.7                  | 0.4 | 3 |
| Impacted   | 2018 | grazer        | <i>Telescopium telescopium</i>   | -16.0                 | 0.5 | 7.8                   | 0.2 | 14.5                  | 0.2 | 6 |
| Impacted   | 2016 | leaf feeder   | <i>Parasesarma or Episesarma</i> | -18.6                 | 0.0 | 9.0                   | 0.4 | 15.7                  | 0.1 | 2 |
| Impacted   | 2017 | leaf feeder   | <i>Parasesarma or Episesarma</i> | -18.3                 | 0.1 | 9.0                   | 0.3 | 16.0                  | 0.5 | 3 |
| Impacted   | 2018 | leaf feeder   | <i>Parasesarma or Episesarma</i> | -18.0                 | 0.7 | 7.7                   | 0.9 | 19.4                  | 1.2 | 3 |

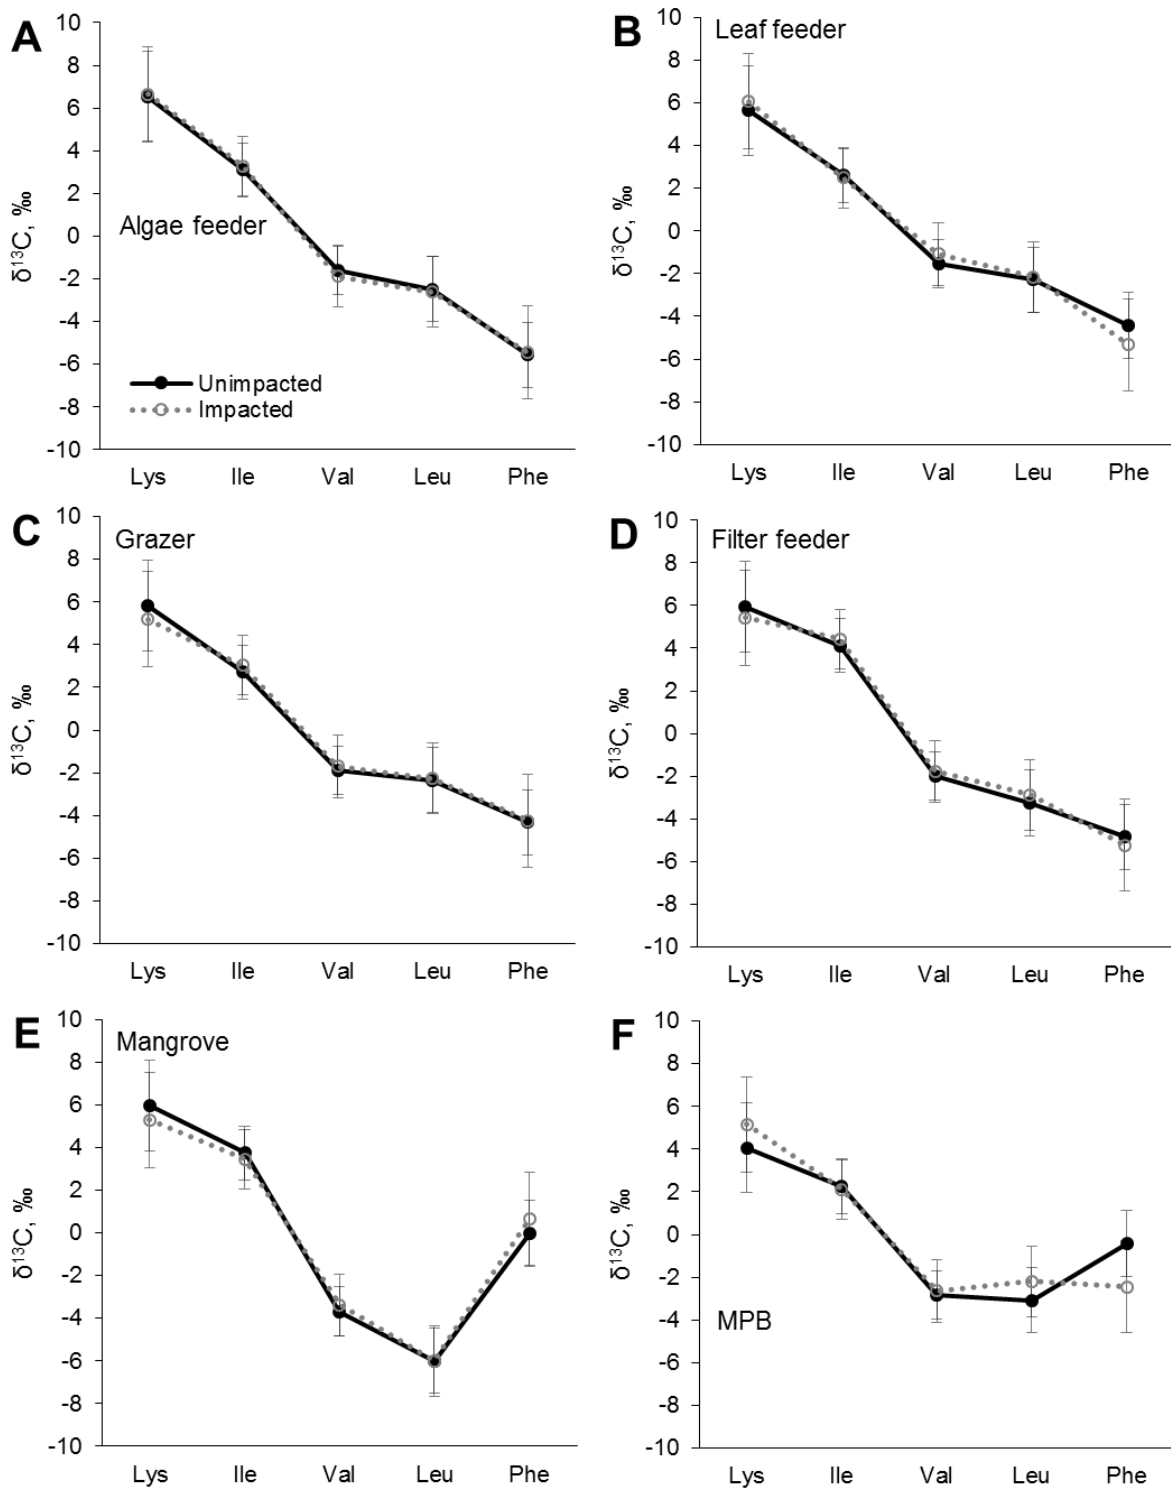

**Figure S1.** Normalized  $\delta^{13}\text{C}_{\text{EAA}}$  fingerprint patterns of four mangrove consumer groups and resources including mangrove leaves and MPB from the unimpacted and impacted mangrove sites during 2017 (20 months after the dieback). The values were normalized to the mean  $\delta^{13}\text{C}$  value of five EAA in the sample as per Larsen (2009). Error bars show  $\pm$  SD. The normalized  $\delta^{13}\text{C}_{\text{EAA}}$  fingerprint patterns did not differ between the forests for all the samples (PERMANOVA  $p > 0.05$ , Table 3).
